# Supplementary material
Source: PubMed Central journal article supplement (PMC7785683)

## Supplemental Tables

**Table S1. ChIP-qPCR primer sequences 5 kb upstream of *ACSL4***

| <b>Primers</b> | <b>Forward sequence</b>  | <b>Reverse sequence</b>  |
|----------------|--------------------------|--------------------------|
| primer 1       | ATTCTGTGCATAGATCTTTGTGT  | TGCTGAGATTACAGGCGTGA     |
| primer 2       | AAGTTTCTTCATATTCTTGCCAAA | GACCCTACATGGCACCTGAT     |
| primer 3       | CCCATATGGTTTCCATCGTG     | CCCTTTAACATACAAAAAGCTTCC |
| primer 4       | TGGGAAGGTCACACAAACAA     | TGCATGGAGTCAAGTTTTTCC    |
| primer 6       | ATTTGGCCTGGTTGTTGGGT     | GCCTTTGCGTGTTAAACTTCAC   |
| primer 7       | GAAGCCCTGCTGCTTGTATT     | AGATAGCCAGGCTGCTCTTG     |
| primer 8       | GCCTGGCTATCTGTTTCAGC     | CAATGCAATTGACAGATTCAAAA  |
| primer 9       | GACAGCCAGAACTGTACACAC    | AGCTTACTGAAGTTCCTCCAGC   |
| primer 10      | TCATCTTCATCCAGCACACTGAT  | TGTCAGGTACGTAATTCACTGGG  |
| primer 11      | GTAAGTGGGTGGGTTTCTTGGA   | TAAGCAGCCCAGGTGACACT     |
| primer 12      | CATTTCAACAAGCACCCCAGAT   | GTGAACTAGCTTCCTGTTCTGA   |
| primer 13      | AGCCCTCAGATAGTTCGCTG     | TCACCGCAGCTTTGTGACAT     |
| primer 14      | AGACTGACAGAAGCGGATCG     | AGACTGACAGAAGCGGATCG     |

**Table S2. Primer sequences used for shRNAs, RT-PCR and ACSL4 primers 9  
Luciferase assay**

| Gene          | Direction        | Sequence (5'-3')                                                            |
|---------------|------------------|-----------------------------------------------------------------------------|
| ACSL4 shRNA 1 | Forward          | TCCCCTAGTGTGAGCTTCTGGAAATTCAAGAGATTTCCAGAAGTTCAACACTGG                      |
|               | Reverse          | AAAACCAGTGTGAACTTCTGGAAATCTCTTGAATTTCCAGAAGCTCAACACTAG                      |
| ACSL4 shRNA 2 | Forward          | TCCCGCAGTGGTTCATGGGTAAATTTCAAGAGAATTTAGCCCATGAACTACTGC                      |
|               | Reverse          | AAAAGCAGTAGTTCATGGGCTAAATTTCTTGAATTTAACCCATGAACCACTGC                       |
| NMT1 shRNA 1  | Forward          | TCCCGCAGTTGTATGCTGTGGTTTCAGAGGAGCTTCAAGAGAGCTCCTCTGAAACCA<br>CAGCATACTGC    |
|               | Reverse          | AAAAGCAGTTGTATGCTGTGGTTTCAGAGGAGCTCCTTGAAGCTCCTCTGAAACCA<br>CAGCATACTGC     |
| NMT1 shRNA 2  | Forward          | TCCCCTGGAGGCAATCAAGCAGACATAGAAGAGTTCAAGAGACTCTTCTATGTCTG<br>CTTGATTGCCTCCAG |
|               | Reverse          | AAAAGTGGAGGCAATCAAGCAGACATAGAAGAGTCTTGAAGTCTTCTATGTCTG<br>CTTGATTGCCTCCAG   |
| ACSL3 shRNA 1 | Forward          | TCCCGTTGTGTAACAGTTGTGAGATTTCAAGAGAATTTCACAACTGTTACACAGC                     |
|               | Reverse          | AAAAGCTGTGTAACAGTTGTGAAATTTCTTGAATTTCAAACTGTTACACAAC                        |
| ACSL3 shRNA 2 | Forward          | TCCCCTGGATGTGATACTTTGGATTTCAAGAGAATCTAAAGTATCACATCCAGG                      |
|               | Reverse          | AAAACCTGGATGTGATACTTTAGATTCTCTTGAATTTCAAAGTATCACATCCAAG                     |
| AR shRNA 1    | Forward          | TCCCGGGCATGCGTTTGGAGATTGTTCAAGAGACAGTCTCCAAACGCATGTCC                       |
|               | Reverse          | AAAAGGACATGCGTTTGGAGACTGTCTCTTGAACAATCTCCAAACGCATGCCC                       |
| AR shRNA 2    | Forward          | TCCCGGGCACTTGAAGTGTGCTTTCAAGAGAAGACGGCAGTTCAAGTGTC                          |
|               | Reverse          | AAAAGGACACTTGAAGTGCCGTTCTCTTGAAGACGACAGTTCAAGTGCCC                          |
| ACSL4         | Forward          | CAGGCCAGTGTGAAAGAATACCT                                                     |
|               | Reverse          | TGGCTTACACAGGAGACATTG                                                       |
| PSA           | Forward          | TCTGCGCGGTGTTCTG                                                            |
|               | Reverse          | GCCGACCCAGCAAGATCA                                                          |
| ACSL3         | Forward          | ACTCCACTGTGCGACAGCTTT                                                       |
|               | Reverse          | CACCACACAACAGGAGACGAA                                                       |
| GAPDH         | Forward          | CCACATCGCTCAGACACCAT                                                        |
|               | Reverse          | ACCAGGCGCCCAATACG                                                           |
| Primer 9-1    | Forward(SacI)    | CATGAGCTCGACAGCCAGAAGTGTACACAC                                              |
|               | Reverse(XhoI)    | CATCTCGAGAGCTTACTGAAGTTCCTCCAGC                                             |
| Primer 9-2    | Forward(XhoI)    | CATCTCGAGGACAGCCAGAAGTGTACACAC                                              |
|               | Reverse(HindIII) | CATAAGCTTAGCTTACTGAAGTTCCTCCAGC                                             |

## Supplemental Figure Legends

**Figure S1. ACSLs expression levels in prostate cancer cell lines.** (A-C) The relative mRNA levels of ACSL1, ACSL3, ACSL4, ACSL5, and ACSL 6 versus GAPDH were analyzed by Real-time RT-PCR in 22Rv1, PC-3 and DU145 cell lines. The relative expression levels of ACSL3 and ACSL4 are two abundant isoforms in the ACSLs family in prostate cancer cells. (D) ACSL3, ACSL4, and AR protein levels in LNCaP, 22Rv1, PC-3 and DU145 cell lines were analyzed by immunoblotting. (E-F) Negative correlation of ACSL4 with KLK2 or KLK3 in prostate cancer. Copy number (mRNA) of KLK2, KLK3, and ACSL4 were extracted from the cBioPortal for Cancer Genomics database (n=118)(21). ACSL4 levels were inversely correlated with KLK2 (E) and KLK3 levels (F) in prostate tumors.

**Figure S2, related to Figure 3. Identification of AR binding sites in the promoter region of *ACSL4* by ChIP-qPCR.** Based on the AR consensus sequence, fourteen potential AR binding sites were selected in the 5 kb upstream region of *ACSL4*. The genomic DNA derived from LNCaP cells treated with DMSO or R1881 were extracted for ChIP-qPCR. The enrichment of the examined *ACSL4* promoter regions covered by the primer pairs-1, 2, 4, 6, 8, 10, 11-14 was analyzed. The data were normalized using the % input method as described in the Materials and Methods with the IgG control in the DMSO treated sample normalized to 1%. The data represent the mean  $\pm$  SEM (n=3). ns: no significance; \*: P<0.05; \*\*: P<0.01.

**Figure S3. ACSL3 and 4 regulation of the biosynthesis of fatty acyl-CoAs and catalytic efficiency.** (A) PC-3 cells were transduced with shRNA-control or shRNA-ACSL3 (shACSL3-1 or 2) by lentiviral infection. The cells were harvested for analysis of C12:0-CoA, C14:0-CoA, C16:0-CoA, C18:0-CoA, C18:1-CoA, C18:2-CoA and C20:4-CoA by LC-MS/MS. The data represent the mean  $\pm$  SD (n=3). \*: P<0.05; \*\*: P<0.01. (B) ACSL3 or ACSL4 catalytic efficiency

of fatty acyl-CoAs biosynthesis was calculated based on the formula: percentage of the decrease of fatty acyl-CoA levels/percentage of the decrease of the relative mRNA levels. To compare ACSL4 catalytic efficiency with ACSL3, the above value was further divided by the ratio of ACSL4 to ACSL3 relative mRNA expression levels. The catalytic efficiency of ACSL3 was set as 1.

**Figure S4. Verification of Myr-Src antibody.** An antibody was developed using the myristoylated octapeptide myristoyl-GSNKSKPKC derived from Src kinase as the antigen. To verify the specificity of the antibody, SYF1(*Src<sup>-/-</sup>Yes<sup>-/-</sup>Fyn<sup>-/-</sup>*) cells were transduced with Src(WT) or Src(G2A), a mutant with loss of the myristoylation site by lentiviral infection. SYF1 cells or the above transduced cells were treated with different concentration of myristic acid (MA) overnight. Cell lysates were subjected to immunoblotting. Expression levels of Src, GAPDH, and myristoylated Src were analyzed by immunoblotting. The antibody was specifically recognized Src(WT), but not Src(G2A) at different MA concentrations.

**Figure S5. Knockdown of ACSL3 has no effect on global protein myristoylation or myristoyl-Src in PC-3 and DU145 cells.** PC-3 and DU145 cells transduced with shRNA-control (shCon) or shRNA-ACSL3 by lentiviral infection were cultured with/without 100  $\mu$ M myristic acid-azide overnight. Global protein myristoylation in LNCaP (**A**) or PC-3 (**B**) expressing shRNA-control (shCon), shRNA-ACSL3 (shACSL3-1 or 2) was analyzed by Click Chemistry, and detected by streptavidin-HRP. ACSL3, Myr-Src, and GAPDH were detected by Western blot. (**C-D**) Three major bands of global protein myristoylation and Myr-Src were analyzed by Image J. Knockdown of ACSL3 did not change Myr-Src levels, or global protein myristoylation. Some bands in global protein myristoylation had a mild increase.

**Figure S6, related to Figure 5. Knockdown of ACSL4 regulates the cell cycle in PC-3 and DU145 cells. A-B)** Knockdown of ACSL4 in PC-3 and DU145 cells. PC-3 (A) and DU145 (B) cells were transduced with shRNA-control or two shRNA-ACSL4 (shACSL4-1 or 2) by lentiviral infection. Knockdown of ACSL4 was measured by Real-time RT-PCR. The data represent the mean  $\pm$  SEM (n=3). \*\*: P<0.01. **(C-H)** PC-3 (C-E) and DU145 cells (F-H) expressing shRNA-Control (shCon) or shRNA-ACSL4 (shACSL4-1 or 2) were subjected to cell cycle analysis by the flow cytometry. The percentage of the cell population in G1, S, and G2 phases was recorded.

Figure S1

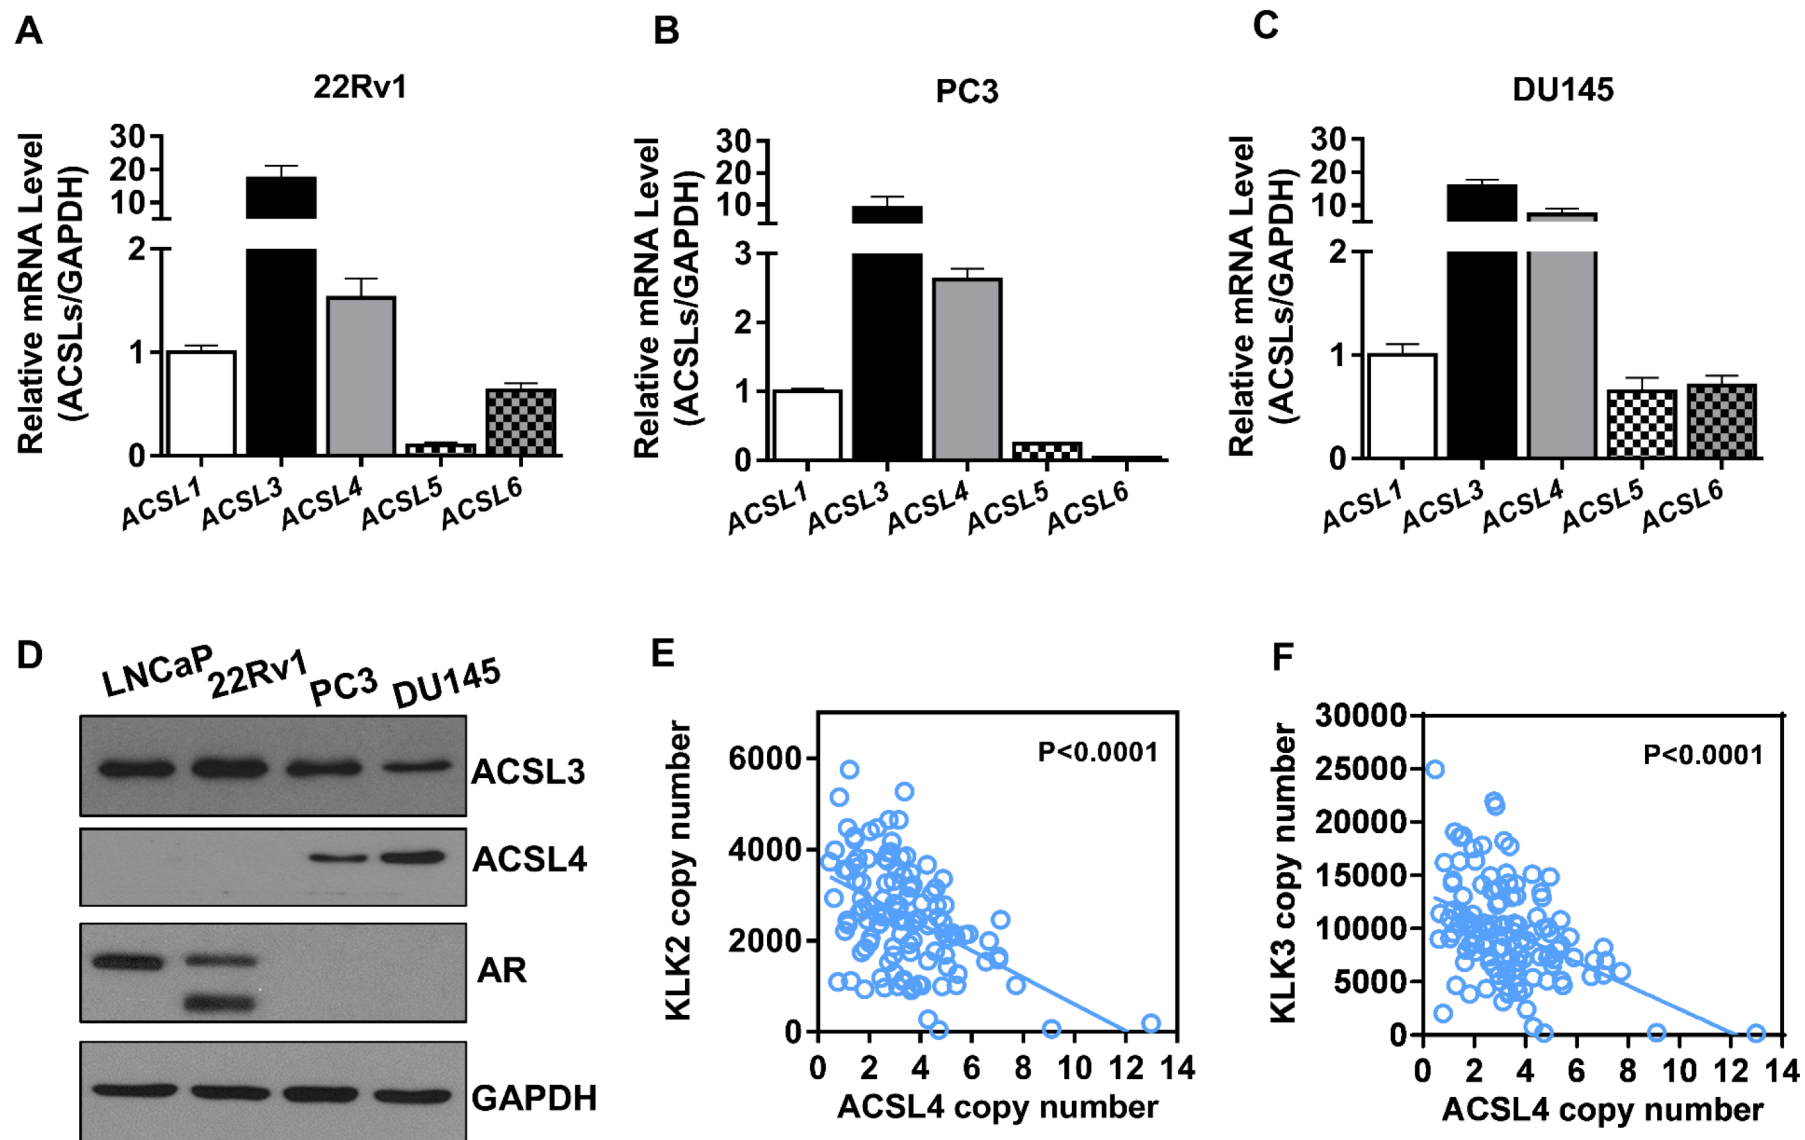

Figure S2

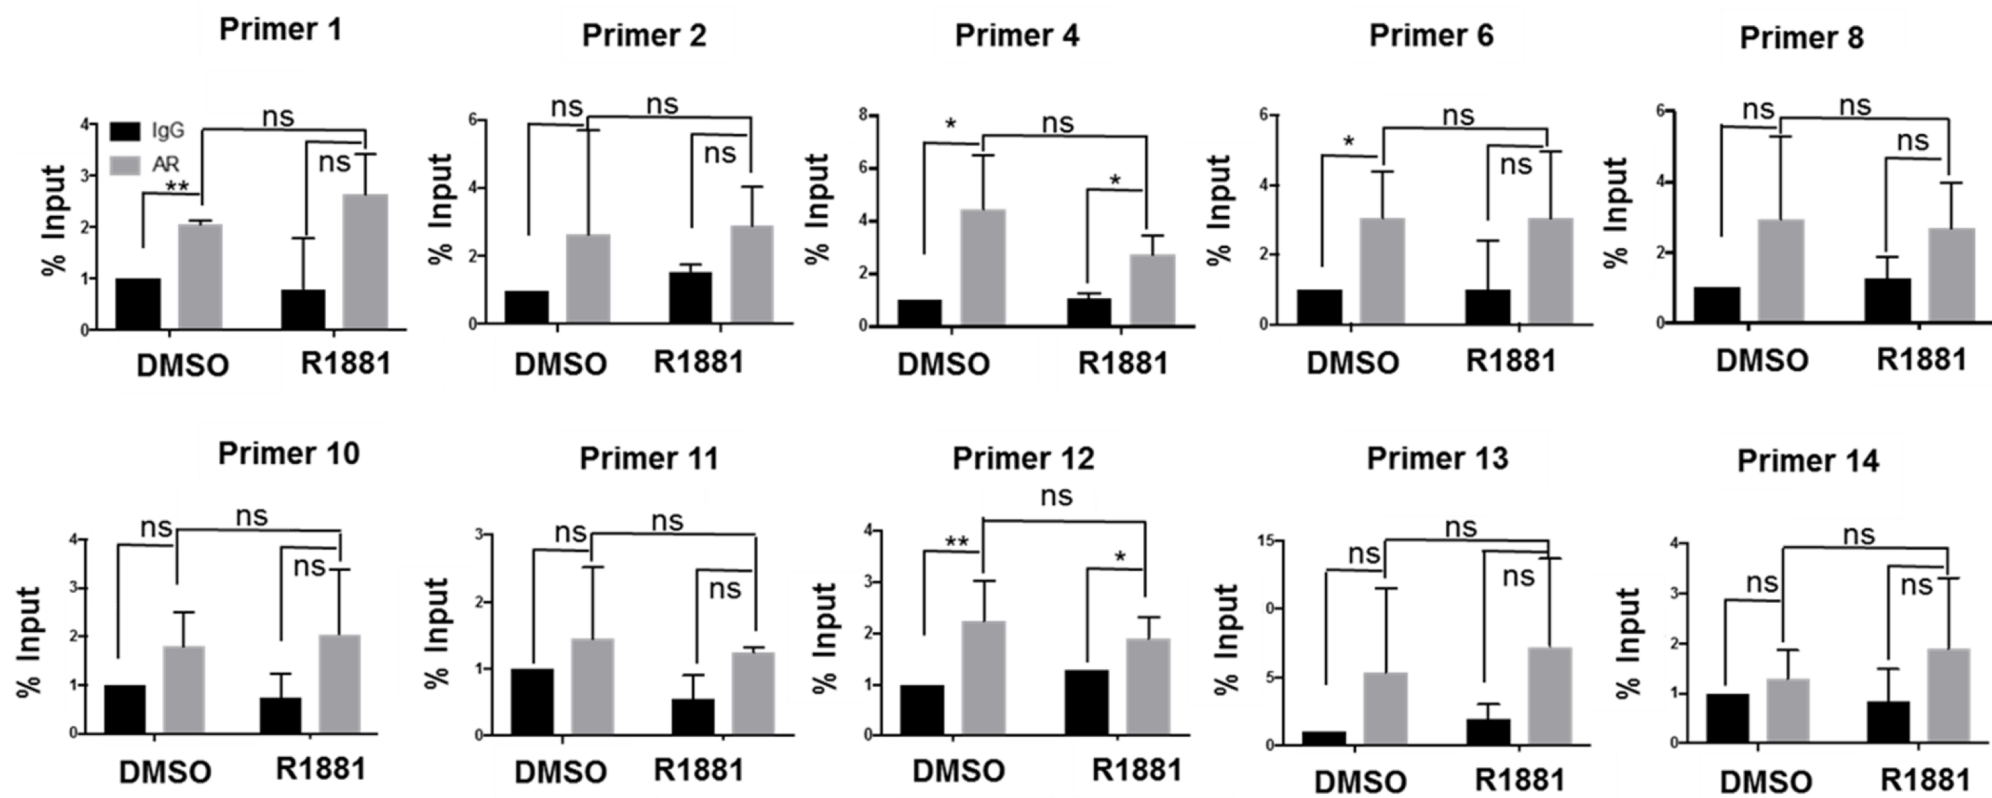

**Figure S3**

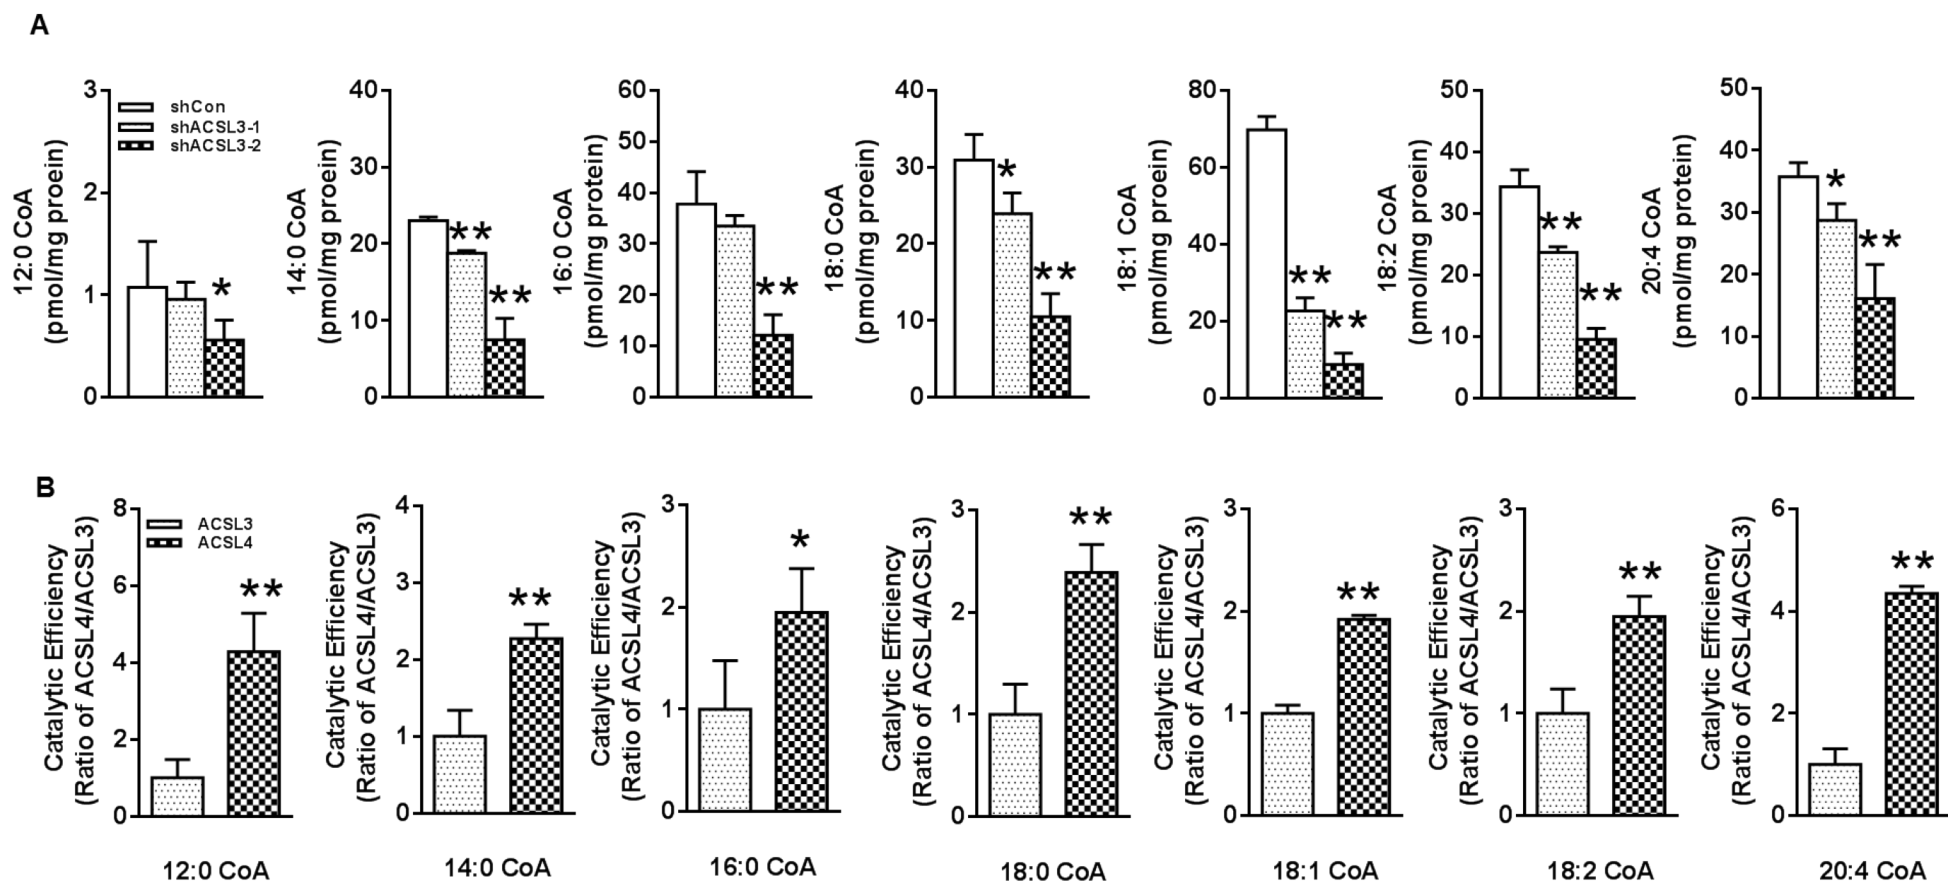



**Figure S4**

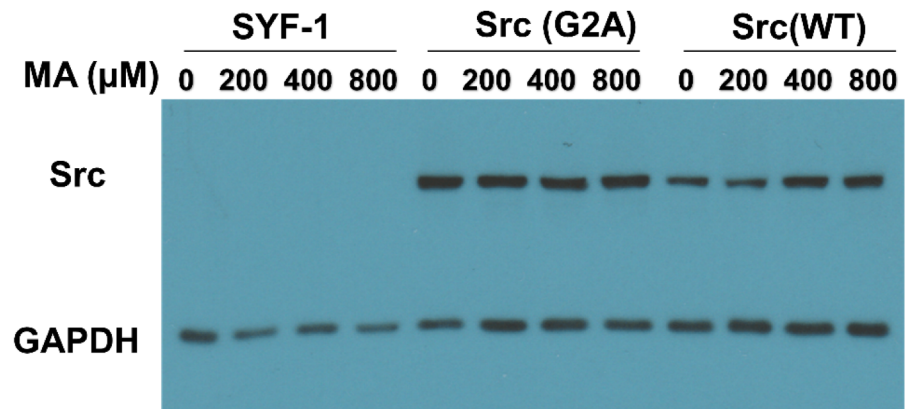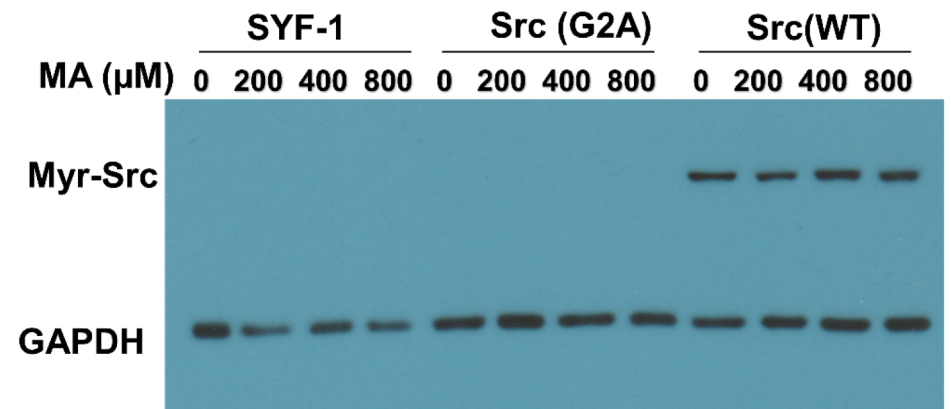

Figure S5

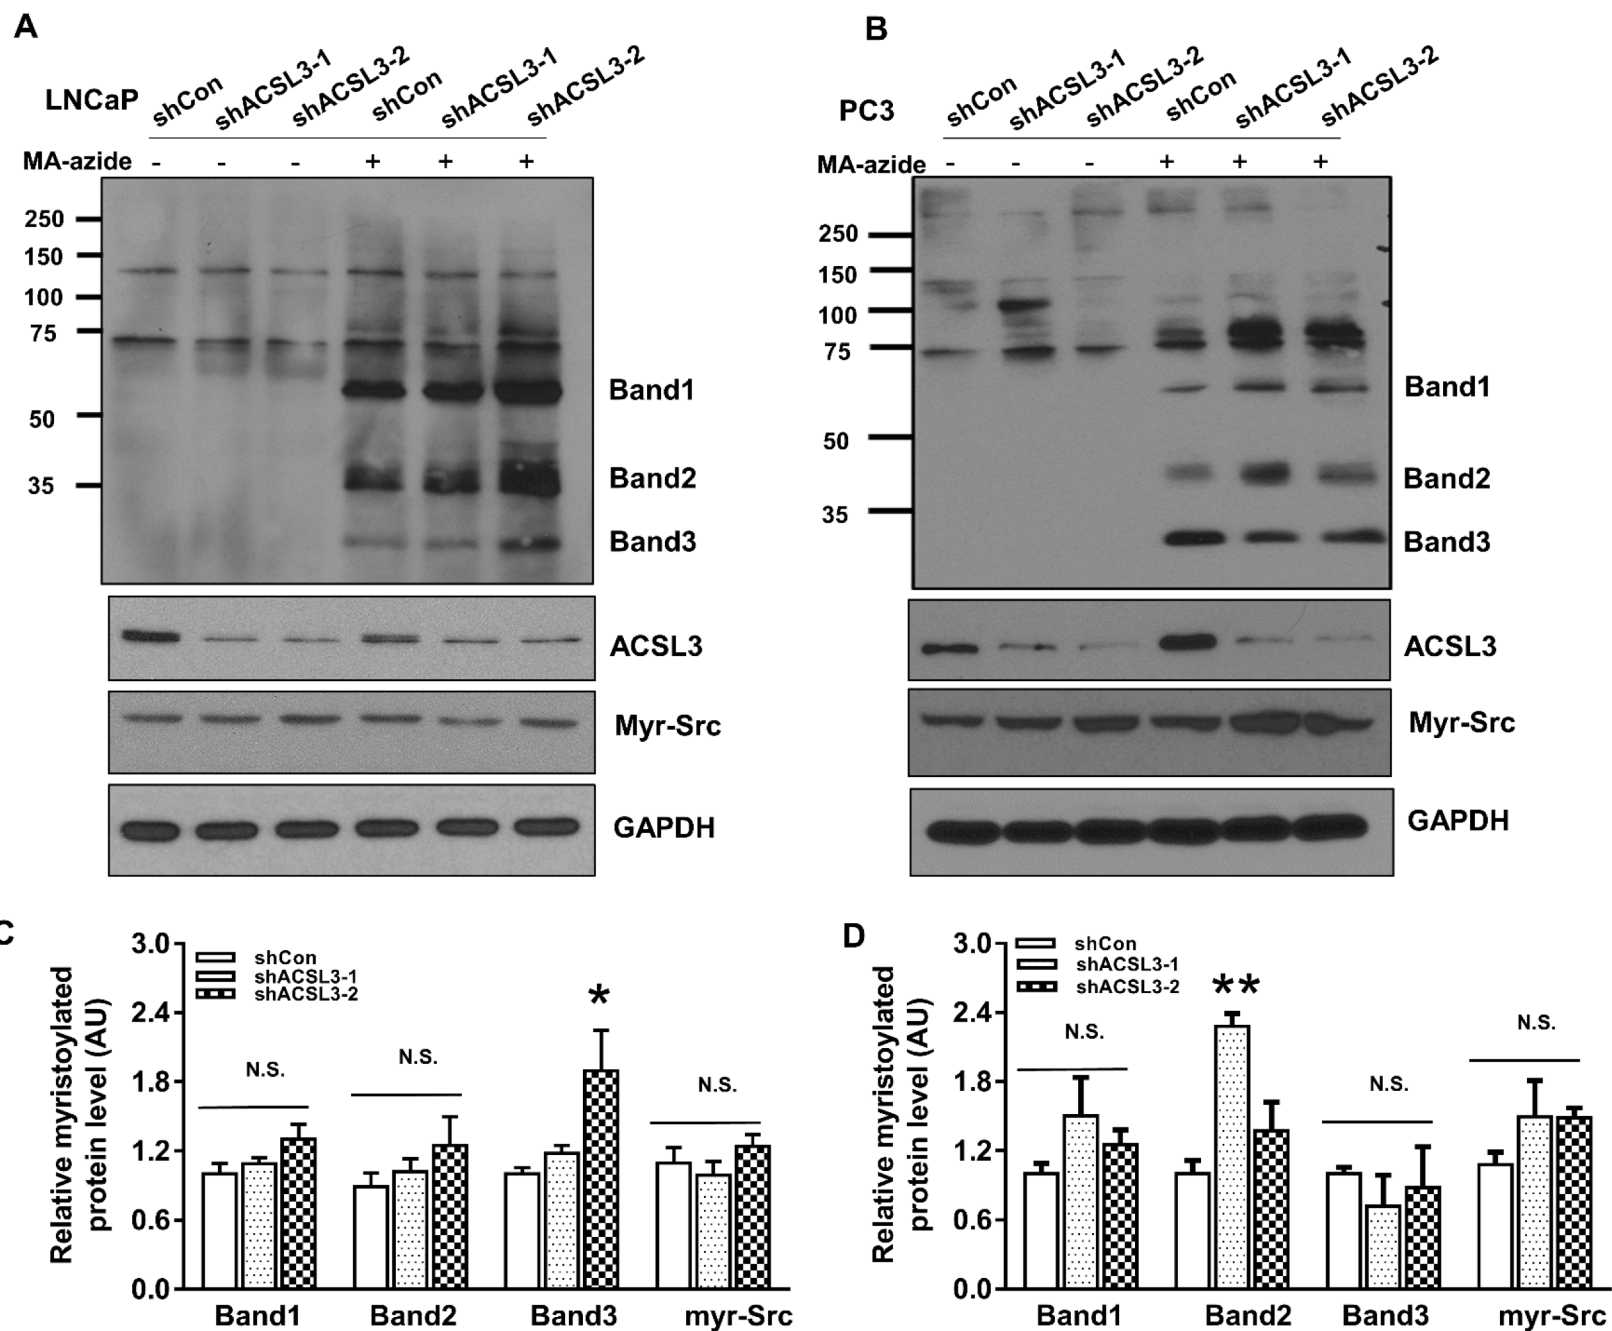

Figure S6

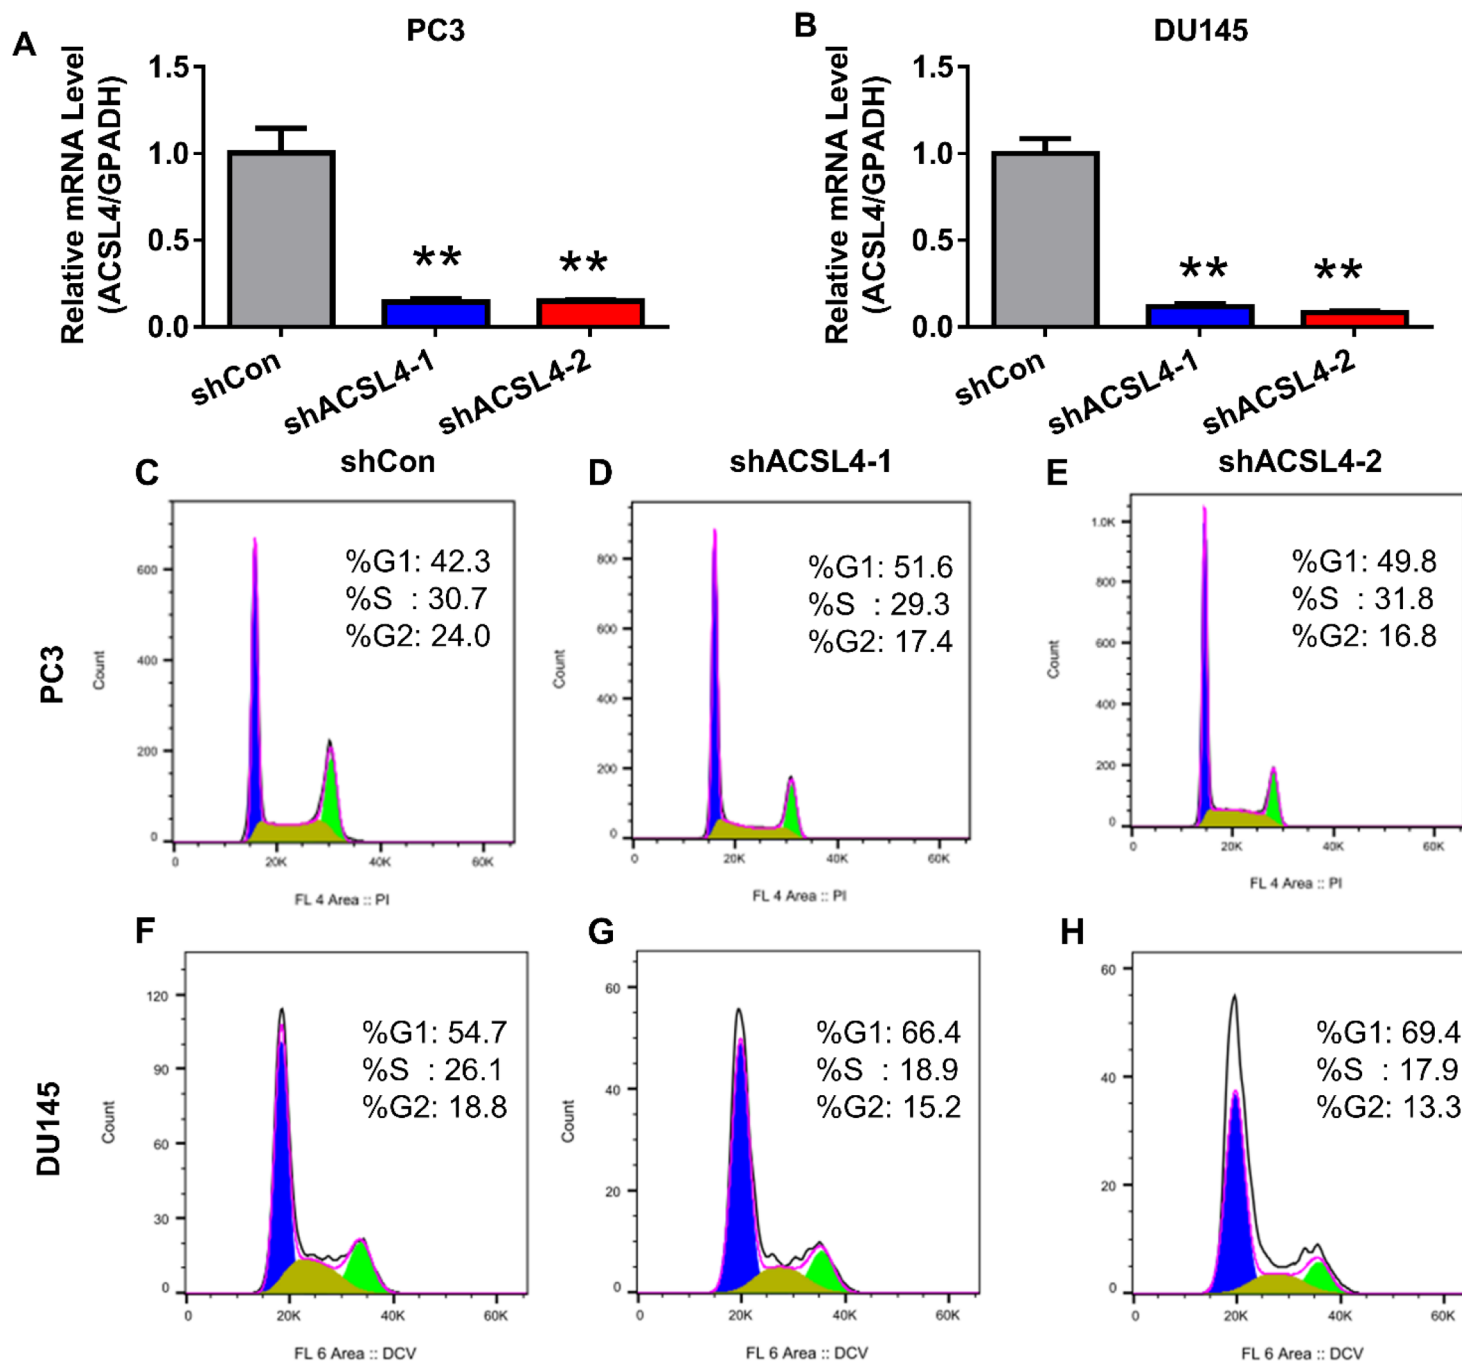

Supplement: NIHMS1639240-supplement-1.pdf [file NIHMS1639240-supplement-1.pdf]
